# The genetic prehistory of the Greater Caucasus

Chuan-Chao Wang<sup>1,2,\*</sup>, Sabine Reinhold<sup>3</sup>, Alexey Kalmykov<sup>4</sup>, Antje Wissgott<sup>1</sup>, Guido Brandt<sup>1</sup>, Choongwon Jeong<sup>1</sup>, Olivia Cheronet<sup>5,6,7</sup>, Matthew Ferry<sup>8,9</sup>, Eadaoin Harney<sup>8,9,10</sup>, Denise Keating<sup>5,7</sup>, Swapan Mallick<sup>8,9,11</sup>, Nadin Rohland<sup>8,11</sup>, Kristin Stewardson<sup>8,9</sup>, Anatoly R. Kantorovich<sup>12</sup>, Vladimir E. Maslov<sup>13</sup>, Vladimira G. Petrenko<sup>13</sup>, Vladimir R. Erlikh<sup>14</sup>, Biaslan Ch. Atabiev<sup>15</sup>, Rabadan G. Magomedov<sup>16</sup>, Philipp L. Kohl<sup>17</sup>, Kurt W. Alt<sup>18,19,20</sup>, Sandra L. Pichler<sup>19</sup>, Claudia Gerling<sup>19</sup>, Harald Meller<sup>21</sup>, Benik Vardanyan<sup>22,23</sup>, Larisa Yeganyan<sup>23</sup>, Alexey D. Rezepkin<sup>24</sup>, Dirk Mariaschk<sup>3</sup>, Natalia Berezina<sup>25</sup>, Julia Gresky<sup>26</sup>, Katharina Fuchs<sup>27</sup>, Corina Knipper<sup>28</sup>, Stephan Schiffels<sup>1</sup>, Elena Balanovska<sup>29</sup>, Oleg Balanovsky<sup>29,30</sup>, Iain Mathieson<sup>31</sup>, Thomas Higham<sup>32</sup>, Yakov B. Berezin<sup>25</sup>, Alexandra Buzhilova<sup>25</sup>, Viktor Trifonov<sup>33</sup>, Ron Pinhasi<sup>34</sup>, Andrej B. Belinskij<sup>4</sup>, David Reich<sup>8,9,11,35</sup>, Svend Hansen<sup>3,\*</sup>, Johannes Krause<sup>1,35,\*</sup> & Wolfgang Haak<sup>1,36,\*</sup>

<sup>1</sup>*Department of Archaeogenetics, Max-Planck Institute for the Science of Human History, Kahlaische Strasse 10, D-07745 Jena, Germany*

<sup>2</sup>*Department of Anthropology and Ethnology, Xiamen University 361005 Xiamen, China*

<sup>3</sup>*German Archaeological Institute, Eurasia Department, Im Dol 2-6, D-14195 Berlin, Germany*

<sup>4</sup>*'Nasledie' Cultural Heritage Unit, 355006 Stavropol, Russia*

<sup>5</sup>*Earth Institute, University College Dublin, Dublin 4, Ireland*

<sup>6</sup>*Department of Anthropology, University of Vienna, 1090 Vienna, Austria*

<sup>7</sup>*School of Archaeology, University College Dublin, Dublin 4, Ireland*

<sup>8</sup>*Department of Genetics, Harvard Medical School, Boston 02115 MA, USA*

<sup>9</sup>*Howard Hughes Medical Institute, Harvard Medical School, Boston 02115 MA, USA*

<sup>10</sup>*Department of Organismic and Evolutionary Biology, Harvard University, Cambridge, MA02138, USA*

<sup>11</sup>*Broad Institute of Harvard and MIT, Cambridge 02142 MA, USA*

<sup>12</sup>*Department of Archaeology, Faculty of History, Lomonosov Moscow State University, Lomonosovsky pr. 27/4, 119192, Moscow, Russia*

<sup>13</sup>*Institute of Archaeology RAS, Ul. Dm. Ulyanova 19, 117036 Moscow, Russian Federation*

<sup>14</sup>*State Museum of Oriental Art, 12a Nikitskiy Boulevard, 119019 Moscow, Russian Federation*

<sup>15</sup>*Ltd. Institute for Caucasus Archaeology, Ul. Katkhanova 30, 361401 Nalchik, Republic Kabardino-Balkaria, Russian Federation*

<sup>16</sup>*Institute of History, Archaeology and Ethnography DNC RAS, Ul. M. Jaragskogo 75, 367030 Makhachkala, Republic Dagestan, Russian Federation*

<sup>17</sup>*Department of Anthropology, Wellesley College, Pendleton East 331, 106 Central Street, Wellesley, MA 02481, USA*

<sup>18</sup>*Danube Private University, A-3500 Krems-Stein, Austria*

<sup>19</sup>*IPAS – Institute of Prehistory and Archaeological Science, University of Basel, CH-4055 Basel, Switzerland*

<sup>20</sup>*Department of Biomedical Engineering, University of Basel, CH-4123 Allschwil, Switzerland*

- 50 <sup>21</sup>*State Heritage Museum, Saxony-Anhalt, D-06114 Halle/Saale, Germany*  
51 <sup>22</sup>*Martin-Luther-Universität Halle-Wittenberg, Germany*  
52 <sup>23</sup>*Shirak Center for Armenological Studies of National Academy of Science RA,*  
53 *Armenia*  
54 <sup>24</sup>*Institute for the History of Material Culture, Russian Academy of Sciences,*  
55 *Dvortsovaya nab.,18, 191186 Saint-Petersburg, Russia*  
56 <sup>25</sup>*Research Institute and Museum of Anthropology of Lomonosov Moscow State*  
57 *University, Mokhovaya 11, Moscow, Russia*  
58 <sup>26</sup>*German Archaeological Institute, Department of Natural Sciences, Im Dol 2-6, D-*  
59 *14195 Berlin, Germany*  
60 <sup>27</sup>*CRC 1266 "Scales of Transformation", Institut für Ur- und Frühgeschichte,*  
61 *Christian-Albrechts-Universität, Johanna-Mestorf-Straße 2-6, 24118 Kiel, Germany*  
62 <sup>28</sup>*Curt Engelhorn Center for Archaeometry gGmbH, 68159 Mannheim, Germany*  
63 <sup>29</sup>*Research Centre for Medical Genetics, Moscow 115478, Russia*  
64 <sup>30</sup>*Vavilov Institute for General Genetics, Moscow 119991, Russia*  
65 <sup>31</sup>*Department of Genetics, Perelman School of Medicine, University of Pennsylvania,*  
66 *Philadelphia PA 19104, USA*  
67 <sup>32</sup>*Oxford Radiocarbon Accelerator Unit, RLAHA, University of Oxford, OX13QY, UK*  
68 <sup>33</sup>*Institute for the History of Material Culture, Russian Academy of Sciences,*  
69 *Dvortsovaya nab.,18, 191186 Saint-Petersburg, Russia*  
70 <sup>34</sup>*Department of Evolutionary Anthropology, University of Vienna, 1010 Vienna,*  
71 *Austria*  
72 <sup>35</sup>*Max Planck-Harvard Research Center for the Archaeoscience of the Ancient*  
73 *Mediterranean, Cambridge, MA 02138, USA*  
74 <sup>36</sup>*School of Biological Sciences, The University of Adelaide, Adelaide 5005, Australia*  
75  
76  
77  
78 \*corresponding authors: [haak@shh.mpg.de](mailto:haak@shh.mpg.de), [krause@shh.mpg.de](mailto:krause@shh.mpg.de),  
79 [wang@xmu.edu.cn](mailto:wang@xmu.edu.cn), [svend.hansen@dainst.de](mailto:svend.hansen@dainst.de)  
80

81 **Abstract**

82 Archaeogenetic studies have described the formation of Eurasian ‘steppe ancestry’ as  
83 a mixture of Eastern and Caucasus hunter-gatherers. However, it remains unclear  
84 when and where this ancestry arose and whether it was related to a horizon of cultural  
85 innovations in the 4<sup>th</sup> millennium BCE that subsequently facilitated the advance of  
86 pastoral societies likely linked to the dispersal of Indo-European languages. To  
87 address this, we generated genome-wide SNP data from 45 prehistoric individuals  
88 along a 3000-year temporal transect in the North Caucasus. We observe a genetic  
89 separation between the groups of the Caucasus and those of the adjacent steppe. The  
90 Caucasus groups are genetically similar to contemporaneous populations south of it,  
91 suggesting that – unlike today – the Caucasus acted as a bridge rather than an  
92 insurmountable barrier to human movement. The steppe groups from Yamnaya and  
93 subsequent pastoralist cultures show evidence for previously undetected farmer-  
94 related ancestry from different contact zones, while Steppe Maykop individuals  
95 harbour additional Upper Palaeolithic Siberian and Native American related ancestry.  
96

97 The 1100-kilometre long Caucasus mountain ranges extend between the Black Sea  
98 and the Caspian Sea and are bound by the rivers Kuban and Terek in the north and by  
99 the Kura and Araxes rivers in the south. With Mount Elbrus in Russian Kabardino-  
100 Balkaria rising to a height of 5642 metres and Mount Shkhara in Georgia to 5201  
101 metres, the Caucasus mountain ranges form a natural barrier between the Eurasian  
102 steppes and the Near East (Fig. 1).

103

104 The rich archaeological record suggests extensive periods of human occupation since  
105 the Upper Palaeolithic<sup>1, 2, 3</sup>. The density of languages and cultures in the region is  
106 mirrored by faunal and floral diversity, and the Caucasus has often been described as  
107 a contact zone and natural refuge with copious ecological niches. However, it also  
108 serves as a bio-geographic border between the steppe and regions to the south such as  
109 Anatolia and Mesopotamia rather than a corridor for human<sup>4, 5</sup> and animal movement<sup>6,</sup>  
110 <sup>7, 8</sup>. The extent to which the Caucasus has played an important role for human  
111 population movements between south and north over the course of human history is  
112 thus a critical question, and one that until now has been unanswered by  
113 archaeogenetic studies.

114

115 A Neolithic lifestyle based on food production began in the Caucasus after 6000  
116 calBCE<sup>9</sup>. In the following millennia the Caucasus region began to play an  
117 increasingly important role in the economies of the growing urban centres in northern  
118 Mesopotamia<sup>10</sup> as a region rich in natural resources such as ores, pastures and  
119 timber<sup>11</sup>. In the 4<sup>th</sup> millennium BCE the archaeological record attests to the presence  
120 of the Maykop and Kura-Araxes cultural complexes, with the latter being found on  
121 both flanks of the Caucasus mountain range, thus clearly demonstrating the  
122 connection between north and south<sup>11</sup>. The Maykop culture was an important player  
123 in the innovative horizon of the 4<sup>th</sup> millennium BCE in Western Eurasia. It is well  
124 known for its rich burial mounds, especially at the eponymous Maykop site in today's  
125 Adygea, which reflect the rise of a new system of social organization<sup>12</sup>. The 4<sup>th</sup>  
126 millennium BCE witnesses a concomitant rise in commodities and technologies such  
127 as the wheel and wagon including associated technology, copper alloys, new  
128 weaponry, and new breeds of domestic sheep<sup>13, 14</sup>.

129

130 The adjacent Pontic-Caspian and Eurasian steppe also played an important role in this  
131 linked economic system, being the most likely region for the domestication of the  
132 horse that revolutionised transport<sup>13</sup>. In addition, many steppe kurgans (large burial  
133 mounds that are first observed in the context of the Maykop culture) have yielded the  
134 remains of wheels and ox-drawn carts, highlighting a mobile economy focused on  
135 cattle and sheep/goat herding<sup>15</sup>. The adoption of the horse almost certainly  
136 contributed to the intensification of pastoralist practices in the Eurasian steppes,  
137 allowing more efficient keeping of larger herds<sup>16, 17, 18</sup> and facilitating the massive  
138 range expansions of pastoralists associated with the Yamnaya cultural community and  
139 related groups from the East European steppe<sup>19, 20</sup>. This transformation changed the  
140 European gene pool during the early 3<sup>rd</sup> millennium BCE and descendants of the  
141 Yamnaya eventually also transformed the ancestry of South Asia as well<sup>21</sup>. However,  
142 flow of goods and ideas between the eastern European steppe zone, the Caucasus, the  
143 Carpathians, and Central Europe has been documented by archaeological and ancient  
144 DNA research as early as the 5<sup>th</sup> millennium BCE, long before the massive migration  
145 took place<sup>22, 23, 24</sup>. Taken together, the Caucasus region played a crucial role in the  
146 prehistory of Western Eurasia and this study aims to shed new light on events in the

147 key period between the 4<sup>th</sup> and 3<sup>rd</sup> millennium BCE.

148

149 Recent ancient DNA studies have enabled the resolution of several long-standing  
150 questions regarding cultural and population transformations in prehistory. One of  
151 these is the Mesolithic-Neolithic transition in Europe, which saw a change from a  
152 hunter-gatherer lifestyle to a sedentary, food-producing subsistence strategy.  
153 Genome-wide data from pre-farming and farming communities have identified  
154 distinct ancestral populations that largely reflect subsistence patterns in addition to  
155 geography<sup>25</sup>. One important feature is a cline of European hunter-gatherer (HG)  
156 ancestry that runs roughly from West to East (hence WHG and EHG; blue component  
157 in Fig. 2A, 2C), which differs greatly from the ancestry of Early European farmers  
158 that in turn is closely related to that of northwest Anatolian farmers<sup>26,27</sup> and more  
159 remotely also to pre-farming individuals from the Levant<sup>23</sup>. The Near East and  
160 Anatolia have long been seen as the regions from which European farming and animal  
161 husbandry emerged. Surprisingly, these regions harboured three divergent  
162 populations, with Anatolian and Levantine ancestry in the western part and a group  
163 with a distinct ancestry in the eastern part first described in Upper Pleistocene  
164 individuals from Georgia (Caucasus hunter-gatherers; CHG)<sup>28</sup> and then in Mesolithic  
165 and Neolithic individuals from Iran<sup>23,29</sup>. The following two millennia, spanning from  
166 the Neolithic to Chalcolithic and Early Bronze Age periods in each region, witnessed  
167 migration and admixture between these ancestral groups, leading to a pattern of  
168 genetic homogenization and reduced genetic distances between these Neolithic source  
169 populations<sup>23</sup>. In parallel, Eneolithic individuals from the Samara region (5200–4000  
170 BCE) also exhibit population mixture, specifically EHG- and CHG/Iranian ancestry, a  
171 combination that forms the so-called ‘steppe-ancestry’<sup>28</sup>. This ancestry eventually  
172 spread further west<sup>19,20</sup>, where it contributed substantially to the ancestry of present-  
173 day Europeans, and east to the Altai region as well as to South Asia<sup>23</sup>.

174

175 To understand and characterize the genetic variation of Caucasian populations,  
176 present-day groups from various geographic, cultural/ethnic and linguistic  
177 backgrounds have been analyzed previously at the autosomal, Y-chromosomal and  
178 mitochondrial level<sup>4,5,30</sup>. Yunusbayev and colleagues described the Greater Caucasus  
179 region as an asymmetric semipermeable barrier based on a higher genetic affinity of  
180 southern Caucasus groups to Anatolian and Near Eastern populations and a genetic  
181 discontinuity between these and populations of the North Caucasus and of adjacent  
182 Eurasian steppes. While autosomal and mitochondrial DNA data appear relatively  
183 homogeneous across diverse ethnic and linguistic groups and the entire mountainous  
184 region, the Y-chromosome diversity reveals a deeper genetic structure attesting to  
185 several male founder effects, with striking correspondence to geography, language  
186 groups and historical events<sup>4,5</sup>.

187

188 In our study we aimed to investigate when and how the genetic patterns observed  
189 today were formed and test whether they have been present since prehistoric times by  
190 generating time-stamped human genome-wide data. We were also interested in  
191 characterizing the role of the Caucasus as a conduit for gene-flow in the past and in  
192 shaping the cultural and genetic makeup of the wider region (Supplementary  
193 Information 1). This has important implications for understanding the means by  
194 which Europe, the Eurasian steppe zone, and the earliest urban centres in the Near  
195 East were connected<sup>31</sup>. We aimed to genetically characterise individuals from cultural  
196 complexes such as the Maykop and Kura-Araxes and assessing the amount of gene



197 flow in the Caucasus during times when the exploitation of resources of the steppe  
198 environment intensified, since this was potentially triggered by the cultural and  
199 technological innovations of the Late Chalcolithic and Early Bronze Age 6000-5000  
200 years ago<sup>11</sup>. Lastly, since the spread of steppe ancestry into central Europe and the  
201 eastern steppes during the early 3<sup>rd</sup> millennium BCE (5000-4500 BP) was a striking  
202 migratory event in human prehistory<sup>19, 20</sup>, we also wanted to retrace the formation of  
203 the steppe ancestry profile and whether this might have been influenced by  
204 neighbouring farming groups to the west or from regions of early urbanization further  
205 south.

206

## 207 **Results**

208

### 209 **Genetic clustering and uniparentally-inherited markers**

210 We report genome-wide data at a targeted set of 1.2 million single nucleotide  
211 polymorphisms (SNPs)<sup>19, 32</sup> for 59 Eneolithic/Chalcolithic and Bronze Age  
212 individuals from the Caucasus region. After filtering out 14 individuals that were  
213 first-degree relatives or showed evidence of contamination or reference bias  
214 (Supplementary Information 3 and Data 1) we retained 45 individuals for downstream  
215 analyses using a cut-off of 30,000 SNPs. We merged our newly generated samples  
216 with previously published ancient and modern data<sup>19, 20, 23, 24, 26, 27, 29, 33, 34, 35, 36, 37, 38, 39,</sup>  
217 <sup>40, 41, 42, 43</sup> (Supplementary Data 2). We first performed principal component analysis  
218 (PCA)<sup>44</sup> and ADMIXTURE<sup>45</sup> analysis to assess the genetic affinities of the ancient  
219 individuals qualitatively (Fig. 2) and followed up quantitatively with formal *f*- and *D*-  
220 statistics, *qpWave*, *qpAdm*, and *qpGraph*<sup>44</sup>. Based on PCA and ADMIXTURE plots  
221 we observe two distinct genetic clusters: one cluster falls with previously published  
222 ancient individuals from the West Eurasian steppe (hence termed ‘*Steppe*’), and the  
223 second clusters with present-day southern Caucasian populations and ancient Bronze  
224 Age individuals from today’s Armenia (henceforth called ‘*Caucasus*’), while a few  
225 individuals take on intermediate positions between the two. The stark distinction seen  
226 in our temporal transect is also visible in the Y-chromosome haplogroup distribution,  
227 with R1/R1b1 and Q1a2 types in the *Steppe* and L, J, and G2 types in the *Caucasus*  
228 cluster (Fig. 3A, Supplementary Data 1). In contrast, the mitochondrial haplogroup  
229 distribution is more diverse and almost identical in both groups (Fig. 3B,  
230 Supplementary Data 1).

231

232 The two distinct clusters are already visible in the oldest individuals of our temporal  
233 transect, dated to the Eneolithic period (~6300-6100 yBP/4300-4100 calBCE). Three  
234 individuals from the sites of Progress 2 and Vonjuchka 1 in the North Caucasus  
235 piedmont steppe (‘Eneolithic steppe’), which harbor Eastern and Caucasian hunter-  
236 gatherer related ancestry (EHG and CHG, respectively), are genetically very similar  
237 to Eneolithic individuals from Khalynsk II and the Samara region<sup>19, 27</sup>. This extends  
238 the cline of dilution of EHG ancestry via CHG/Iranian-like ancestry to sites  
239 immediately north of the Caucasus foothills (Fig. 2D).

240 In contrast, the oldest individuals from the northern mountain flank itself, which are  
241 three first degree-related individuals from the Unakozovskaya cave associated with  
242 the Darkveti-Meshoko Eneolithic culture (analysis label ‘Eneolithic Caucasus’) show  
243 mixed ancestry mostly derived from sources related to the Anatolian Neolithic  
244 (orange) and CHG/Iran Neolithic (green) in the ADMIXTURE plot (Fig. 2C). While  
245 similar ancestry profiles have been reported for Anatolian and Armenian Chalcolithic  
246 and Bronze Age individuals<sup>20, 23</sup>, this result suggests the presence of the mixed

247 Anatolian/Iranian/CHG related ancestry north of the Great Caucasus Range as early  
248 as ~6500 years ago.

249

### 250 **Ancient North Eurasian ancestry in ‘Steppe Maykop’ individuals**

251 Four individuals from mounds in the grass steppe zone, which are archaeologically  
252 associated with the ‘Steppe Maykop’ cultural complex (Supplementary Information  
253 1), lack the Anatolian farmer-related component when compared to contemporaneous  
254 Maykop individuals from the foothills. Instead they carry a third and fourth ancestry  
255 component that is linked deeply to Upper Paleolithic Siberians (maximized in the  
256 individual Afontova Gora 3 (AG3)<sup>36, 37</sup> and Native Americans, respectively, and in  
257 modern-day North Asians such as North Siberian Nganasan (Supplementary Fig. 1).  
258 To illustrate this affinity with ‘ancient North Eurasians’ (ANE)<sup>26</sup>, we also ran PCA  
259 with 147 Eurasian (Supplementary Fig. 2A) and 29 Native American populations  
260 (Supplementary Fig. 2B). The latter represent a cline from ANE-rich steppe  
261 populations such as EHG, Eneolithic individuals, AG3 and Mal’ta 1 (MA1) to  
262 modern-day Native Americans at the opposite end. To formally test the excess of  
263 alleles shared with ANE/Native Americans we performed  $f_4$ -statistics of the form  
264  $f_4(\text{Mbuti}, X; \text{Steppe Maykop}, \text{Eneolithic steppe})$ , which resulted in significantly  
265 positive Z scores  $|Z > 3|$  for AG3, MA1, EHG, Clovis and Kennewick for the ancient  
266 populations and many present-day Native American populations (Supplementary  
267 Table 1). Based on these observations we used *qpWave* and *qpAdm* methods to model  
268 the number of ancestral sources contributing to the Steppe Maykop individuals and  
269 their relative ancestry coefficients. Simple two-way models of Steppe Maykop as an  
270 admixture of Eneolithic steppe, AG3 or Kennewick do not fit (Supplementary Table  
271 2). However, we could successfully model Steppe Maykop ancestry as being derived  
272 from populations related to all three sources (p-value 0.371 for rank 2): Eneolithic  
273 steppe (63.5±2.9 %), AG3 (29.6±3.4%) and Kennewick (6.9±1.0%) (Fig. 4;  
274 Supplementary Table 3). We note that the Kennewick related signal is most likely  
275 driven by the East Eurasian part of Native American ancestry as the  $f_4$ -statistics  
276 (Steppe\_Maykop, Fitted Steppe\_Maykop; Outgroup1, Outgroup2) show that the  
277 Steppe Maykop individuals share more alleles not only with Karitiana but also with  
278 Han Chinese when compared with the fitted ones using Eneolithic steppe and AG3 as  
279 two sources and Mbuti, Karitiana and Han as outgroups (Supplementary Table 2).

280

### 281 **Characterising the *Caucasus* ancestry profile**

282 The Maykop period, represented by twelve individuals from eight Maykop sites  
283 (Maykop, n=2; a cultural variant ‘Novosvobodnaya’ from the site Klady, n=4; and  
284 Late Maykop, n=6) in the northern foothills appear homogeneous. These individuals  
285 closely resemble the preceding Caucasus Eneolithic individuals and present a  
286 continuation of the local genetic profile. This ancestry persists in the following  
287 centuries at least until ~3100 yBP (1100 calBCE) in the mountains, as revealed by  
288 individuals from Kura-Araxes from both the northeast (Velikent, Dagestan) and the  
289 South Caucasus (Kaps, Armenia), as well as Middle and Late Bronze Age individuals  
290 (e.g. Kudachurt, Marchenkova Gora) from the north. Overall, this *Caucasus* ancestry  
291 profile falls among the ‘Armenian and Iranian Chalcolithic’ individuals and is  
292 indistinguishable from other Kura-Araxes individuals (‘Armenian Early Bronze Age’)  
293 on the PCA plot (Fig. 2), suggesting a dual origin involving Anatolian/Levantine and  
294 Iran Neolithic/CHG ancestry, with only minimal EHG/WHG contribution possibly as  
295 part of the Anatolian farmer-related ancestry<sup>23</sup>.

296 Admixture  $f_3$ -statistics of the form  $f_3(X, Y; \text{target})$  with the *Caucasus* cluster as target  
297 resulted in significantly negative Z scores  $|Z| < -3$  when CHG (or AG3 in Late  
298 Maykop) were used as one and Anatolian farmers as the second potential source  
299 (Supplementary Table 4). We also used *qpWave* to determine the number of streams  
300 of ancestry and found that a minimum of two is sufficient (except for Eneolithic  
301 Caucasus or Dolmen LBA, for which one source is sufficient (Supplementary Table  
302 5).  
303 We then tested whether each temporal/cultural group of the *Caucasus* cluster could be  
304 modelled as a simple two-way admixture by exploring all possible pairs of sources in  
305 *qpWave*. We found support for CHG as one source and Anatolian farmer-related  
306 ancestry or a derived form such as is found in southeastern Europe as the other  
307 (Supplementary Table 6). We focused on model of mixture of proximal sources (Fig.  
308 4B) such as CHG and Anatolian Chalcolithic for all six groups of the Caucasus  
309 cluster (Eneolithic Caucasus, Maykop and Late Makyop, Maykop-Novosvobodnaya,  
310 Kura-Araxes, and Dolmen LBA), with admixture proportions on a genetic cline of 40-  
311 72% Anatolian Chalcolithic related and 28-60% CHG related (Supplementary Table  
312 7). When we explored Romania\_EN and Greece\_Neolithic individuals as alternative  
313 southeast European sources (30-46% and 36-49%), the CHG proportions increased to  
314 54-70% and 51-64%, respectively. We hypothesize that alternative models, replacing  
315 the Anatolian Chalcolithic individual with yet unsampled populations from eastern  
316 Anatolia, South Caucasus or northern Mesopotamia, would probably also provide a fit  
317 to the data from some of the tested Caucasus groups. The models replacing CHG with  
318 Iran Neolithic-related individuals could explain the data in a two-way admixture with  
319 the combination of Armenia Chalcolithic or Anatolia Chalcolithic as the other source.  
320 However, models replacing CHG with EHG individuals received no support  
321 (Supplementary Table 8), indicating no strong influence for admixture from the  
322 adjacent steppe to the north. In an attempt to account for potentially un-modelled  
323 ancestry in the Caucasus groups, we added EHG, WHG and Iran Chalcolithic as  
324 additional sources in the previous two-way modelling. The resulting ancestry  
325 coefficients do not deviate substantially from 0 (high standard errors) when adding  
326 EHG or WHG, suggesting very limited direct ancestry from both hunter-gatherer  
327 groups (Supplementary Table 9). Alternatively, when we added Iran Chalcolithic  
328 individuals as a third source to the model, we observed that Kura-Araxes and  
329 Maykop-Novosvobodnaya individuals had likely received additional Iran  
330 Chalcolithic-related ancestry (24.9% and 37.4%, respectively; Fig. 4; Supplementary  
331 Table 10).

332

### 333 **Characterising the *Steppe* ancestry profile in the North Caucasus**

334 Individuals from the North Caucasian steppe associated with the Yamnaya cultural  
335 formation (5300-4400 BP, 3300-2400 calBCE) appear genetically almost identical to  
336 previously reported Yamnaya individuals from Kalmykia<sup>20</sup> immediately to the north,  
337 the middle Volga region<sup>19,27</sup>, Ukraine and Hungary, and to other Bronze Age  
338 individuals from the Eurasian steppes who share the characteristic ‘steppe ancestry’  
339 profile as a mixture of EHG and CHG/Iranian ancestry<sup>23,28</sup>. These individuals form a  
340 tight cluster in PCA space (Figure 2) and can be shown formally to be a mixture by  
341 significantly negative admixture  $f_3$ -statistics of the form  $f_3(\text{EHG}, \text{CHG}; \text{target})$   
342 (Supplementary Fig. 3). This also involves individuals assigned to the North Caucasus  
343 culture (4800-4500 BP, 2800-2500 calBCE) in the piedmont steppe of the central  
344 North Caucasus, who share the steppe ancestry profile. Individuals from the  
345 Catacomb culture in the Kuban, Caspian and piedmont steppes (4600-4200 BP, 2600-



346 2200 calBCE), which succeeded the Yamnaya horizon, also show a continuation of  
347 the ‘steppe ancestry’ profile.

348

349 The individuals of the Middle Bronze Age (MBA) post-Catacomb horizon (4200-  
350 3700 BP, 2200-1700 calBCE) such as Late North Caucasus and Lola culture represent  
351 both ancestry profiles common in the North Caucasus region: individuals from the  
352 mountain site Kabardinka show a typical steppe ancestry profile, whereas individuals  
353 from the Late North Caucasus site Kudachurt 90 km to the west retain the ‘southern’  
354 Caucasus profile. The latter is also observed in our most recent individual from the  
355 western Late Bronze Age Dolmen culture (3400-3200 BP, 1400-1200 calBCE). In  
356 contrast, one individual assigned to the Lola culture resembles the ancestry profile of  
357 the Steppe Maykop individuals.

358

### 359 **Admixture into the steppe zone from the south**

360 Evidence for interaction between the *Caucasus* and the *Steppe* clusters is visible in  
361 our genetic data from individuals associated with the later Steppe Maykop phase  
362 around 5300-5100 years ago. These ‘outlier’ individuals were buried in the same  
363 mounds as those with steppe and in particular Steppe Maykop ancestry profiles but  
364 share a higher proportion of Anatolian farmer-related ancestry visible in the  
365 ADMIXTURE plot and are also shifted towards the *Caucasus* cluster in PC space  
366 (Fig. 2D). This observation is confirmed by formal *D*-statistics (Steppe Maykop  
367 outlier, Steppe Maykop; X; Mbuti), which are significantly positive when X is a  
368 Neolithic or Bronze Age group from the Near East or Anatolia (Supplementary Fig.  
369 4). By modelling Steppe Maykop outliers successfully as a two-way mixture of  
370 Steppe Maykop and representatives of the *Caucasus* cluster (Supplementary Table 3),  
371 we can show that these individuals received additional ‘Anatolian and Iranian  
372 Neolithic ancestry’, most likely from contemporaneous sources in the south. We  
373 estimated admixture time for the observed farmer-related ancestry individuals using  
374 the linkage disequilibrium (LD)-based admixture inference implemented in  
375 ALDER<sup>46</sup>, using Steppe Maykop outliers as the test population and Steppe Maykop as  
376 well as Kura-Araxes as references. The average admixture time for Steppe Maykop  
377 outliers is about 20 generations or 560 years ago, assuming a generation time of 28  
378 years<sup>47</sup> (Supplementary Information 6).

379

### 380 **Contribution of Anatolian farmer-related ancestry to Bronze Age steppe groups**

381 In principal component space Eneolithic individuals (Samara Eneolithic) form a cline  
382 running from EHG to CHG (Fig. 2D), which is continued by the newly reported  
383 Eneolithic steppe individuals. However, the trajectory of this cline changes in the  
384 subsequent centuries. Here we observe a cline from Eneolithic\_steppe towards the  
385 *Caucasus* cluster. We can qualitatively explain this ‘tilting cline’ by developments  
386 south of the Caucasus, where Iranian and Anatolian/Levantine Neolithic ancestries  
387 continue to mix, resulting in a blend that is also observed in the *Caucasus* cluster,  
388 from where it could have spread onto the steppe. The first appearance of ‘Near  
389 Eastern farmer related ancestry’ in the steppe zone is evident in Steppe Maykop  
390 outliers. However, PCA results also suggest that Yamnaya and later groups of the  
391 West Eurasian steppe carry some farmer related ancestry as they are slightly shifted  
392 towards ‘European Neolithic groups’ in PC2 (Fig. 2D) compared to Eneolithic steppe.  
393 This is not the case for the preceding Eneolithic steppe individuals. The tilting cline is  
394 also confirmed by admixture  $f_3$ -statistics, which provide statistically negative values  
395 for AG3 as one source and any Anatolian Neolithic related group as a second source

396 (Supplementary Table 11). Detailed exploration via  $D$ -statistics in the form of  
397  $D(\text{EHG, steppe group; X, Mbuti})$  and  $D(\text{Samara\_Eneolithic, steppe group; X, Mbuti})$   
398 show significantly negative  $D$  values for most of the steppe groups when X is a  
399 member of the *Caucasus* cluster or one of the Levant/Anatolia farmer-related groups  
400 (Supplementary Figs. 5 and 6). In addition, we used  $f$ - and  $D$ -statistics to explore the  
401 shared ancestry with Anatolian Neolithic as well as the reciprocal relationship  
402 between Anatolian- and Iranian farmer-related ancestry for all groups of our two main  
403 clusters and relevant adjacent regions (Supplementary Fig. 4). Here, we observe an  
404 increase in farmer-related ancestry (both Anatolian and Iranian) in our *Steppe* cluster,  
405 ranging from Eneolithic steppe to later groups. In Middle/Late Bronze Age groups  
406 especially to the north and east we observe a further increase of Anatolian farmer-  
407 related ancestry consistent with previous studies of the Poltavka, Andronovo,  
408 Srubnaya and Sintashta groups<sup>23, 27</sup> and reflecting a different process not especially  
409 related to events in the Caucasus.

410  
411 The exact geographic and temporal origin of this Anatolian farmer-related ancestry in  
412 the North Caucasus and later in the steppe is difficult to discern from our data. Not  
413 only do the *Steppe* groups vary in their respective affinity to each of the two, but also  
414 the *Caucasus* groups, which represent potential sources from a geographic and  
415 cultural point of view, are mixtures of them both<sup>23</sup>. We therefore used  $qpWave$  and  
416  $qpAdm$  to explore the number of ancestry sources for the Anatolian farmer-related  
417 component to evaluate whether geographically proximate groups plausibly  
418 contributed to the subtle shift of Eneolithic ancestry in the steppe towards those of the  
419 Neolithic groups. Specifically, we tested whether any of the Eurasian steppe ancestry  
420 groups can be successfully modelled as a two-way admixture between Eneolithic  
421 steppe and a population X derived from Anatolian- or Iranian farmer-related ancestry,  
422 respectively. Surprisingly, we found that a minimum of four streams of ancestry is  
423 needed to explain all eleven steppe ancestry groups tested, including previously  
424 published ones (Fig. 2; Supplementary Table 12). Importantly, our results show a  
425 subtle contribution of both Anatolian farmer-related ancestry and WHG-related  
426 ancestry (Fig.4; Supplementary Tables 13 and 14), which was likely contributed  
427 through Middle and Late Neolithic farming groups from adjacent regions in the West.  
428 A direct source of Anatolian farmer-related ancestry can be ruled out (Supplementary  
429 Table 15). At present, due to the limits of our resolution, we cannot identify a single  
430 best source population. However, geographically proximal and contemporaneous  
431 groups such as Globular Amphora and Eneolithic groups from the Black Sea area  
432 (Ukraine and Bulgaria), which represent all four distal sources (CHG, EHG, WHG,  
433 and Anatolian\_Neolithic) are among the best supported candidates (Fig. 4;  
434 Supplementary Tables 13,14 and 15). Applying the same method to the subsequent  
435 North Caucasian *Steppe* groups such as Catacomb, North Caucasus, and Late North  
436 Caucasus confirms this pattern (Supplementary Table 17).

437  
438 Using  $qpAdm$  with Globular Amphora as a proximate surrogate population (assuming  
439 that a related group was the source of the Anatolian farmer-related ancestry), we  
440 estimated the contribution of Anatolian farmer-related ancestry into Yamnaya and  
441 other steppe groups. We find that Yamnaya individuals from the Volga region  
442 (Yamnaya Samara) have  $13.2 \pm 2.7\%$  and Yamnaya individuals in Hungary  $17.1 \pm 4.1\%$   
443 Anatolian farmer-related ancestry (Fig.4; Supplementary Table 18)– statistically  
444 indistinguishable proportions. Replacing Globular Amphora by Iberia Chalcolithic,  
445 for instance, does not alter the results profoundly (Supplementary Table 19). This

446 suggests that the source population was a mixture of Anatolian farmer-related  
447 ancestry and a minimum of 20% WHG ancestry, a profile that is shared by many  
448 Middle/Late Neolithic and Chalcolithic individuals from Europe of the 3<sup>rd</sup> millennium  
449 BCE analysed thus far.

450 To account for potentially un-modelled ancestry from the *Caucasus* groups, we added  
451 ‘Eneolithic Caucasus’ as an additional source to build a three-way model. We found  
452 that Yamnaya Caucasus, Yamnaya Ukraine Ozero, North Caucasus and Late North  
453 Caucasus had likely received additional ancestry (6% to 40%) from nearby *Caucasus*  
454 groups (Supplementary Table 20). This suggests a more complex and dynamic picture  
455 of steppe ancestry groups through time, including the formation of a local variant of  
456 steppe ancestry in the North Caucasian steppe from the local Eneolithic, a  
457 contribution of Steppe Maykop groups, and population continuity between the early  
458 Yamnaya period and the Middle Bronze Age (5300-3200 BP, 3300-2200 calBCE).  
459 This was interspersed by additional, albeit subtle gene-flow from the West and  
460 occasional equally subtle gene flow from neighbouring groups in the Caucasus and  
461 piedmont zones.

462

### 463 **Insights from micro-transects through time**

464 The availability of multiple individuals from one site (here burial mounds or kurgans)  
465 allowed us to test genetic continuity on a micro-transect level. By focusing on two  
466 kurgans (Marinskaya 5 and Sharakhalsun 6), for which we could successfully  
467 generate genome-wide data from four and five individuals, respectively, we observe  
468 that the genetic ancestry varied through time, alternating between the *Steppe* and  
469 *Caucasus* ancestries (Supplementary Fig. 8). This shows that the apparent genetic  
470 border between the two distinct genetic clusters was shifting over time. We also  
471 detected various degrees of kinship between individuals buried in the same mound,  
472 which supports the view that particular mounds reflected genealogical lineages.  
473 Overall, we observe a balanced sex ratio within our sites across the individuals tested  
474 (Supplementary Information 4).

475

### 476 **A joint model of ancient populations of the Caucasus region**

477 We used *qpGraph* to explore models that jointly explain the population splits and  
478 gene flow in the Greater Caucasus region by computing  $f_2$ -,  $f_3$ - and  $f_4$ - statistics  
479 measuring allele sharing among pairs, triples, and quadruples of populations and  
480 evaluating fits based on the maximum  $|Z|$ -score comparing predicted and observed  
481 values of these statistics. Our fitted model recapitulates the genetic separation  
482 between the *Caucasus* and *Steppe* groups with the Eneolithic steppe individuals  
483 deriving more than 60% of ancestry from EHG and the remainder from a CHG-  
484 related basal lineage, whereas the Maykop group received about 86.4% from CHG,  
485 9.6% Anatolian farming related ancestry, and 4% from EHG. The Yamnaya  
486 individuals from the Caucasus derived the majority of their ancestry from Eneolithic  
487 steppe individuals but also received about 16% from Globular Amphora-related  
488 farmers (Fig. 5).

489

490

## 491 **Discussion**

492

493 Our data from the Greater Caucasus region cover over 3000 years of prehistory as a  
494 transect through time, ranging from the Eneolithic (starting 6500 yBP, 4500 calBCE)  
495 to the Late Bronze Age (ending 3200 yBP, 1200 calBCE). We observe a genetic

496 separation between the groups in the piedmont steppe, i.e. the northern foothills of the  
497 Greater Caucasus, and those groups of the bordering herb, grass and desert steppe  
498 regions in the north (i.e. the ‘real’ steppe). We have summarised these broadly as  
499 *Caucasus* and *Steppe* groups in correspondence with the eco-geographic vegetation  
500 zones that characterise the socio-economic basis of the associated archaeological  
501 cultures.

502  
503 When compared to present-day human populations from the Caucasus, which show a  
504 clear separation into North and South Caucasus groups along the Great Caucasus  
505 mountain range (Fig. 2D), our new data highlights that the situation during the Bronze  
506 Age was quite different. The fact that individuals buried in kurgans in the North  
507 Caucasian piedmont and foothill zone are more closely related to ancient individuals  
508 from regions further south in today’s Armenia, Georgia and Iran allows us to draw  
509 two major conclusions.

510  
511 First, sometime after the Bronze Age present-day North Caucasian populations must  
512 have received additional gene-flow from populations north of the mountain range that  
513 separates them from southern Caucasians, who largely retained the Bronze Age  
514 ancestry profile. The archaeological and historic records suggest numerous incursions  
515 during the subsequent Iron Age and Medieval times<sup>48</sup>, but ancient DNA from these  
516 time periods is needed to test this directly.

517  
518 Second, our results reveal that the Greater Caucasus Mountains were not an  
519 insurmountable barrier to human movement in prehistory. Instead the foothills to the  
520 north at the interface of the steppe and mountain ecozones could be seen as a transfer  
521 zone of cultural innovations from the south and the adjacent Eurasian steppes to the  
522 north, as attested by the archaeological record. The latter is best exemplified by the  
523 two Steppe Maykop outlier individuals dating to 5100-5000 yBP/3100-3000 calBCE,  
524 which carry additional Anatolian farmer-related ancestry likely derived from a  
525 proximate source related to the *Caucasus* cluster. We could show that individuals  
526 from the contemporaneous Maykop period in the piedmont region are likely  
527 candidates for the source of this ancestry and might explain the regular presence of  
528 ‘Maykop artefacts’ in burials that share Steppe Eneolithic traditions and are  
529 genetically assigned to the *Steppe* group. Hence the diverse ‘Steppe Maykop’ group  
530 indeed represents the mutual entanglement of *Steppe* and *Caucasus* groups and their  
531 cultural affiliations in this interaction sphere.

532  
533 Concerning the influences from the south, our oldest dates from the immediate  
534 Maykop predecessors Darkveti-Meshoko (Eneolithic Caucasus) indicate that the  
535 *Caucasus* genetic profile was present north of the range ~6500 BP, 4500 calBCE.  
536 This is in accordance with the Neolithization of the Caucasus, which had started in the  
537 flood plains of the great rivers in the South Caucasus in the 6<sup>th</sup> millennium BCE from  
538 where it spread to the West and Northwest Caucasus during the 5<sup>th</sup> millennium BCE<sup>9</sup>,  
539 <sup>49</sup>. It remains unclear whether the local CHG ancestry profile (represented by Late  
540 Upper Palaeolithic/Mesolithic individuals from Kotias Klde and Satsurbliia in today’s  
541 Georgia) was also present in the North Caucasus region before the Neolithic.  
542 However, if we take the Caucasus hunter-gatherer individuals from Georgia as a local  
543 baseline and the oldest Eneolithic Caucasus individuals from our transect as a proxy  
544 for the local Late Neolithic ancestry, we notice a substantial increase in Anatolian  
545 farmer-related ancestry. This in all likelihood is linked to the process of



546 Neolithization, which also brought this type of ancestry to Europe. As a consequence,  
547 it is possible that Neolithic groups could have reached the northern flanks of the  
548 Caucasus earlier<sup>50</sup> (Supplementary Information 1) and in contact with local hunter-  
549 gatherers facilitated the exploration of the steppe environment for pastoralist  
550 economies. Hence, additional sampling from older individuals is needed to fill this  
551 temporal and spatial gap.

552  
553 Our results show that at the time of the eponymous grave mound of Maykop, the  
554 North Caucasus piedmont region was genetically connected to the south. Even  
555 without direct ancient DNA data from northern Mesopotamia, the new genetic  
556 evidence suggests an increased assimilation of Chalcolithic individuals from Iran,  
557 Anatolia and Armenia and those of the Eneolithic Caucasus during 6000-4000  
558 calBCE<sup>23</sup>, and thus likely also intensified cultural connections. Within this sphere of  
559 interaction, it is possible that cultural influences and continuous subtle gene flow from  
560 the south formed the basis of Maykop (Fig. 4; Supplementary Table 10). In fact, the  
561 Maykop phenomenon was long understood as the terminus of the expansion of South  
562 Mesopotamian civilisations in the 4<sup>th</sup> millennium BCE<sup>11, 12, 51</sup>. It has been further  
563 suggested that along with the cultural and demographic influence the key  
564 technological innovations that had revolutionised the late 4<sup>th</sup> millennium BCE in  
565 western Asia had ultimately also spread to Europe<sup>52</sup>. An earlier connection in the late  
566 5<sup>th</sup> millennium BCE, however, allows speculations about an alternative archaeological  
567 scenario: was the cultural exchange mutual and did e.g. metal rich areas such as the  
568 Caucasus contribute substantially to the development and transfer of these  
569 innovations<sup>53, 54</sup>?

570  
571 We also observe a degree of genetic continuity within each cluster. While this  
572 continuity in each cluster spans the 3000 years covered in this study, we also detect  
573 occasional gene-flow between the two clusters as well as from outside sources.  
574 Moreover, our data shows that the northern flanks were consistently linked to the  
575 Near East and had received multiple streams of gene flow from the south, as seen e.g.  
576 during the Maykop, Kura-Araxes and late phase of the North Caucasus culture.  
577 Interestingly, this renewed appearance of the southern genetic make-up in the  
578 foothills corresponds to a period of climatic deterioration (known as 4.2 ky event) in  
579 the steppe zone, that put a halt to the exploitation of the steppe zone for several  
580 hundred years<sup>55</sup>. Further insight arises from individuals that were buried in the same  
581 kurgan but in different time periods, as highlighted in the two kurgans Marinskaya 5  
582 and Sharakhalsun 6. Here, we recognize that the distinction between *Steppe* and  
583 *Caucasus* with reference to vegetation zones (Fig. 1) is not strict but rather reflects a  
584 shifting border of genetic ancestry through time, possibly due to climatic shifts and/or  
585 cultural factors linked to subsistence strategies or social exchange. It seems plausible  
586 that the occurrence of *Steppe* ancestry in the piedmont region of the northern foothills  
587 coincides with the range expansion of the Yamnaya pastoralists. However, more time-  
588 stamped data from this region will be needed to provide further details on the  
589 dynamics of this contact zone.

590  
591 An interesting observation is that steppe zone individuals directly north of the  
592 Caucasus (Eneolithic Samara and Eneolithic steppe) had initially not received any  
593 gene flow from Anatolian farmers. Instead, the ancestry profile in Eneolithic steppe  
594 individuals shows an even mixture of EHG and CHG ancestry, which argues for an  
595 effective cultural and genetic border between the contemporaneous Eneolithic



596 populations in the North Caucasus, notably *Steppe* and *Caucasus*. Due to the temporal  
597 limitations of our dataset, we currently cannot determine whether this ancestry is  
598 stemming from an existing natural genetic gradient running from EHG far to the north  
599 to CHG/Iran in the south or whether this is the result of farmers with Iranian farmer/  
600 CHG-related ancestry reaching the steppe zone independent of and prior to a stream  
601 of Anatolian farmer-like ancestry, where they mixed with local hunter-gatherers that  
602 carried only EHG ancestry.

603  
604 Another important observation is that all later individuals in the steppe region, starting  
605 with Yamnaya, deviate from the EHG-CHG admixture cline towards European  
606 populations in the West. This documents that these individuals had received  
607 Anatolian farmer-related ancestry, as documented by quantitative tests and recently  
608 also shown for two Yamnaya individuals from Ukraine (Ozera) and one from  
609 Bulgaria<sup>24</sup>. For the North Caucasus region, this genetic contribution could have  
610 occurred through immediate contact with groups in the *Caucasus* or further south. An  
611 alternative source, explaining the increase in WHG-related ancestry, would be contact  
612 with contemporaneous Chalcolithic/EBA farming groups at the western periphery of  
613 the Yamnaya culture distribution area, such as Globular Amphora and Tripolye  
614 (Cucuteni–Trypillia) individuals from Ukraine, which also have been shown to carry  
615 Anatolian Neolithic farmer-derived ancestry<sup>24</sup>.

616  
617 Archaeological arguments would be consonant with both scenarios. Contact between  
618 early Yamnaya and late Maykop groups at the end of the 4<sup>th</sup> millennium BCE is  
619 suggested by impulses seen in early Yamnaya complexes. A western sphere of  
620 interaction is evident from striking resemblances of imagery inside burial chambers of  
621 Central Europe and the Caucasus<sup>56</sup> (Supplementary Fig. 9), and particular similarities  
622 also exist in geometric decoration patterns in stone cist graves in the Northern Pontic  
623 steppe<sup>57</sup>, on stone *stelae* in the Caucasus<sup>58</sup>, and on pottery of the Eastern Globular  
624 Amphora Culture, which links the eastern fringe of the Carpathians and the Baltic  
625 Sea<sup>56</sup>. This implies an overlap of symbols with a communication and interaction  
626 network that formed during the late 4<sup>th</sup> millennium BCE and operated across the  
627 Black Sea area involving the Caucasus<sup>59, 60</sup>, and later also involved early Globular  
628 Amphora groups in the Carpathians and east/central Europe<sup>61</sup>. The role of early  
629 Yamnaya groups within this network is still unclear<sup>57</sup>. However, this interaction zone  
630 pre-dates any direct influence of Yamnaya groups in Europe or the succeeding  
631 formation of the Corded Ware<sup>62, 63</sup> and its persistence opens the possibility of subtle  
632 bidirectional gene-flow, several centuries before the massive range expansions of  
633 pastoralist groups that reached Central Europe in the mid-3<sup>rd</sup> millennium BCE<sup>19, 35</sup>.

634  
635 We were surprised to discover that Steppe Maykop individuals from the eastern desert  
636 steppes harboured a distinctive ancestry component that relates them to Upper  
637 Palaeolithic Siberian individuals (AG3, MA1) and Native Americans. This is  
638 exemplified by the more commonly East Asian features such as the derived EDAR  
639 allele, which has also been observed in EHG from Karelia and Scandinavian hunter-  
640 gatherers (SHG). The additional affinity to East Asians suggests that this ancestry  
641 does not derive directly from Ancestral North Eurasians but from a yet-to-be-  
642 identified ancestral population in north-central Eurasia with a wide distribution  
643 between the Caucasus, the Ural Mountains and the Pacific coast<sup>21</sup>, of which we have  
644 discovered the so far southwestern-most and also youngest (e.g. the Lola culture  
645 individual) genetic representative.

646

647 The insight that the Caucasus mountains served not only as a corridor for the spread  
648 of CHG/Neolithic Iranian ancestry but also for later gene-flow from the south also has  
649 a bearing on the postulated homelands of Proto-Indo-European (PIE) languages and  
650 documented gene-flows that could have carried a consecutive spread of both across  
651 West Eurasia<sup>17, 64</sup>. Perceiving the Caucasus as an occasional bridge rather than a strict  
652 border during the Eneolithic and Bronze Age opens up the possibility of a homeland  
653 of PIE south of the Caucasus, which itself provides a parsimonious explanation for an  
654 early branching off of Anatolian languages. Geographically this would also work for  
655 Armenian and Greek, for which genetic data also supports an eastern influence from  
656 Anatolia or the southern Caucasus. A potential offshoot of the Indo-Iranian branch to  
657 the east is possible, but the latest ancient DNA results from South Asia also lend  
658 weight to an LMBA spread via the steppe belt<sup>21</sup>. The spread of some or all of the  
659 proto-Indo-European branches would have been possible via the North Caucasus and  
660 Pontic region and from there, along with pastoralist expansions, to the heart of  
661 Europe. This scenario finds support from the well attested and now widely  
662 documented ‘steppe ancestry’ in European populations, the postulate of increasingly  
663 patrilinear societies in the wake of these expansions (exemplified by R1a/R1b), as  
664 attested in the latest study on the Bell Beaker phenomenon<sup>35</sup>.

665

666

## 667 **Materials and Methods**

668

### 669 **Sample collection**

670 Samples from archaeological human remains were collected and exported under a  
671 collaborative research agreement between the Max-Planck Institute for the Science of  
672 Human History, the German Archaeological Institute and the Lomonosov Moscow  
673 State University and Anuchin Research Institute and Museum of Anthropology  
674 (permission no. № 114-18/204-03).

675

### 676 **Ancient DNA analysis**

677 We extracted DNA and prepared next-generation sequencing libraries from 107  
678 samples in two dedicated ancient DNA laboratories at Jena and Boston. Samples  
679 passing initial QC were further processed at the Max Planck Institute for the Science  
680 of Human History, Jena, Germany following the established protocols for DNA  
681 extraction and library preparation<sup>65, 66</sup>. Fourteen of these samples were processed at  
682 Harvard Medical School, Boston, USA following a published protocol by replacing  
683 the extender-MinElute-column assembly with the columns from the Roche High Pure  
684 Viral Nucleic Acid Large Volume Kit to extract DNA from about 75mg of sample  
685 powder from each sample. All libraries were subjected to partial (“half”) Uracil-  
686 DNA-glycosylase (UDG) treatment before blunt end repair. We performed in-solution  
687 enrichment (1240K capture)<sup>27</sup> for a targeted set of 1,237,207 SNPs that comprises two  
688 previously reported sets of 394,577 SNPs (390k capture) and 842,630 SNPs, and then  
689 sequenced on an in-house Illumina HiSeq 4000 or NextSeq 500 platform for 76bp  
690 either single or paired-end.

691

692 The sequence data was demultiplexed, adaptor clipped with leehom<sup>67</sup> and then further  
693 processed using *EAGER*<sup>68</sup>, which included mapping with *BWA (v0.6.1)*<sup>69</sup> against  
694 human genome reference GRCh37/hg19, and removing duplicate reads with the same  
695 orientation and start and end positions. To avoid an excess of remaining C-to-T and

696 G-to-A transitions at the ends of the reads, three bases of the ends of each read were  
697 clipped for each sample using trimBam  
698 ([https://genome.sph.umich.edu/wiki/BamUtil:\\_trimBam](https://genome.sph.umich.edu/wiki/BamUtil:_trimBam)). We generated “pseudo-  
699 haploid” calls by selecting a single read randomly for each individual at each of the  
700 targeted SNP positions using the in-house genotype caller *pileupCaller*  
701 (<https://github.com/stschiff/sequenceTools/tree/master/src-pileupCaller>).

702

### 703 **Quality control**

704 We report, but have not analyzed, data from individuals that had less than 30,000  
705 SNPs hit on the 1240K set. We removed individuals with evidence of contamination  
706 based on heterozygosity in the mtDNA genome data, a high rate of heterozygosity on  
707 the X chromosome despite being male estimated with *ANGSD*<sup>70</sup>, or an atypical ratio  
708 of the reads mapped to X versus Y chromosomes.

709

### 710 **Merging new and published ancient and modern population data**

711 We merged our newly generated ancient samples with ancient populations from the  
712 publicly available datasets<sup>13, 19, 20, 24, 27, 28, 33, 35, 37</sup> (Supplementary Data 2), as well as  
713 genotyping data from worldwide modern populations using Human Origins arrays  
714 published in the same publications. We also included newly genotyped populations  
715 from the Caucasus and Asia, described in detail in Jeong et al.<sup>71</sup>.

716

### 717 **Principal Component Analysis**

718 We carried out principal component analysis on Human Origins Dataset using the  
719 *smartpca* program of *EIGENSOFT*<sup>44</sup>, using default parameters and the lsqproject:  
720 YES, numoutlieriter: 0, and shrinkmode:YES options to project ancient individuals  
721 onto the first two components.

722

### 723 **ADMIXTURE analysis**

724 We carried out *ADMIXTURE* (v1.23)<sup>45</sup> analysis after pruning for linkage  
725 disequilibrium in *PLINK*<sup>72</sup> with parameters --indep-pairwise 200 25 0.4, which  
726 retained 301,801 SNPs for the Human Origins Dataset. We ran *ADMIXTURE* with  
727 default 5-fold cross-validation (--cv=5), varying the number of ancestral populations  
728 between K=2 and K=22 in 100 bootstraps with different random seeds.

729

### 730 ***f*-statistics**

731 We computed *D*-statistics and *f*<sub>4</sub>-statistics using *qpDstat* program of *ADMIXTOOLS*<sup>44</sup>  
732 with default parameters. We computed the admixture *f*<sub>3</sub>-statistics using the *qp3Pop*  
733 program of *ADMIXTOOLS* with the flag inbreed: YES. *ADMIXTOOLS* computes  
734 standard errors using the default block jackknife.

735

### 736 **Testing for streams of ancestry and inference of mixture proportions**

737 We used *qpWave* and *qpAdm*<sup>19</sup> as implemented in *ADMIXTOOLS* to test whether a set  
738 of test populations is consistent with being related via *N* streams of ancestry from a  
739 set of outgroup populations and estimate mixture proportions for a *Test* population as  
740 a combination of *N* ‘reference’ populations by exploiting (but not explicitly modeling)  
741 shared genetic drift with a set of outgroup populations. Mbuti.DG, Ust\_Ishim.DG,  
742 Kostenki14, MA1, Han.DG, Papuan.DG, Onge.DG, Villabruna, Vestonice16,  
743 ElMiron, Ethiopia\_4500BP.SG, Karitiana.DG, Natufian, Iran\_Ganj\_Dareh\_Neolithic.  
744 The “DG” samples are extracted from high coverage genomes sequenced as part of  
745 the Simons Genome Diversity Project<sup>33</sup>. For some analyses, we used an extended set

746 of outgroup populations, including some of the following additional ancient  
747 populations to constrain standard errors: WHG, EHG, and Levant Neolithic.

748

#### 749 **Dating of gene-flow events**

750 We estimated the time depth of selected admixture events using the linkage  
751 disequilibrium (LD)-based admixture inference implemented in *ALDER*<sup>46</sup>.

752

#### 753 **Admixture graph modelling**

754 Admixture graph modelling was carried out with the *qpGraph* software as  
755 implemented in *ADMIXTOOLS*<sup>44</sup> using Mbuti.DG as an outgroup.

756

#### 757 **Sex determination and Y chromosomal and mtDNA haplogroup assignment**

758 We determined the sex of the newly reported samples in this study by counting the  
759 number of reads overlapping with the targets of 1240k capture reagent<sup>37</sup>. We  
760 extracted the reads of high base and mapping quality (*samtools* depth -q30 -Q37)  
761 using *samtools v1.3.1*<sup>73</sup>. We calculated the ratios of the numbers of reads mapped on  
762 X chromosome or Y chromosome compared with that mapped on autosomes (X-rate  
763 and Y-rate, respectively). Samples with an X-rate < 0.42 and a Y-rate > 0.26 were  
764 assigned as males and those with an X-rate > 0.68 and a Y-rate < 0.02 were assigned  
765 as females.

766 We used *EAGER* and *samtools v1.3.1* to extract reads from the 1240k SNP and  
767 mitocapture data mapped to the rCRS. We used *Geneious R8.1.9*<sup>74</sup> to locally realign,  
768 visually inspect the pileups for contamination, and to call consensus sequences, which  
769 were used for haplotyping in *HaploGrep 2*<sup>75</sup>. In addition, we used the software  
770 *contamMix 1.0.10*, which employs a Bayesian approach to estimate contamination in  
771 the mitochondrial genome<sup>76</sup>.

772 We called Y chromosomal haplogroups for males using the captured SNPs on Y  
773 chromosome by restricting to sequences with mapping quality  $\geq 30$  and bases with  
774 base quality  $\geq 30$ . We determined Y chromosomal haplogroups by identifying the  
775 most derived allele upstream and the most ancestral allele downstream in the  
776 phylogenetic tree in the ISOGG version 11.89 (accessed March 31, 2016)  
777 (<http://www.isogg.org/tree>).

778

#### 779 **Kinship analysis**

780 We used outgroup-*f*<sub>3</sub> statistics and the methods *lcMLkin*<sup>77</sup> and *READ*<sup>78</sup> to determine  
781 genetic kinship between individuals.

782

#### 783 **Phenotypic SNP calls**

784 We determined the allele information of 5 SNPs (rs4988235, rs16891982, rs1426654,  
785 rs3827760, rs12913832) thought to be affected by selection in our ancient samples  
786 using the captured SNPs by restricting to sequences with mapping quality  $\geq 30$  and  
787 bases with base quality  $\geq 30$  (Supplementary Information 7).

788

#### 789 **Abbreviations**

790 We use the following abbreviated labels throughout the manuscript: E, Early; M,  
791 Middle; L, Late; N, Neolithic; BA, Bronze Age; WHG, EHG, CHG, Western,  
792 Eastern, Caucasus hunter-gatherers, respectively; Mal'ta 1, MA1; Afontova Gora 3,  
793 AG3.

794

#### 795 **Data availability**

796 Data is deposited in the European Nucleotide Archive under the accession numbers  
797 XXX–XXX (will be made available during revision).

798

799 **Acknowledgments**

800 We thank Stephen Clayton and all members of the MPI-SHH Archaeogenetics  
801 Department for support, Michelle O'Reilly and Hans Sell for graphics support, and  
802 Iosif Lazaridis and Nick Patterson for critical discussions. We thank Susanne  
803 Lindauer, Ronny Friedrich, Robin van Gyseghem and Ute Blach for radiocarbon  
804 dating support. This work was funded by the Max Planck Society and the German  
805 Archaeological Institute (DAI). C.C.W. was funded by Nanqiang Outstanding Young  
806 Talents Program of Xiamen University (X2123302) and the Fundamental Research  
807 Funds for the Central Universities.

808

809 **Author contributions**

810 SH, JK, CCW, SR and WH conceived the idea for the study design. AW, GB, OC,  
811 MF, EH, DK, SM, NR, KS and WH performed and supervised wet and dry lab work.  
812 SH, AK, ARK, VEM, VGP, VRE, BCA, RGM, PLK, KWA, SLP, CG, HM, BV, LY,  
813 ADR, DM, NYB, JG, KF, CK, YBB, APB, VT, RP, SH and ABB assembled skeletal  
814 material, contextual information and provided site descriptions. CCW, SR and WH  
815 analysed data. CJ, IM, SS, EB, OB provided additional data and methods. WH, CCW,  
816 SR, SH, VT, RP, TH, DR and JK wrote the manuscript with input from all authors.

817

818



819 **References**

820

821

822

823

824

825

826

827

828

829

830

831

832

833

834

835

836

837

838

839

840

841

842

843

844

845

846

847

848

849

850

851

852

853

854

855

856

857

858

859

860

861

862

863

864

865

866

867

1. Adler DS, *et al.* Early Levallois technology and the Lower to Middle Paleolithic transition in the Southern Caucasus. *Science* **345**, 1609-1613 (2014).
2. Pinhasi R, *et al.* New chronology for the Middle Palaeolithic of the southern Caucasus suggests early demise of Neanderthals in this region. *Journal of Human Evolution* **63**, 770-780 (2012).
3. Lordkipanidze D, *et al.* A complete skull from Dmanisi, Georgia, and the evolutionary biology of early Homo. *Science* **342**, 326-331 (2013).
4. Yunusbayev B, *et al.* The caucasus as an asymmetric semipermeable barrier to ancient human migrations. *Molecular Biology and Evolution* **29**, 359-365 (2012).
5. Balanovsky O, *et al.* Parallel evolution of genes and languages in the Caucasus region. *Mol Biol Evol* **28**, 2905-2920 (2011).
6. Orth A, *et al.* [Polytypic species *Mus musculus* in Transcaucasia]. *C R Acad Sci III* **319**, 435-441 (1996).
7. Manceau V, Despres L, Bouvet J, Taberlet P. Systematics of the genus *Capra* inferred from mitochondrial DNA sequence data. *Mol Phylogenet Evol* **13**, 504-510 (1999).
8. Seddon JM, Santucci F, Reeve N, Hewitt GM. Caucasus Mountains divide postulated postglacial colonization routes in the white-breasted hedgehog, *Erinaceus concolor*. *Journal of Evolutionary Biology* **15**, 463-467 (2002).
9. Helwing B, *et al.* The Kura projects: New research on the later prehistory of the southern Caucasus. In: *Archäologie in Iran und Turan* (ed<sup>^</sup>(eds). Dietrich Reimer Verlag (2017).
10. Stein GJ. The Development of Indigenous Social Complexity in Late Chalcolithic Upper Mesopotamia in the 5th-4th Millennia BC - An Initial Assessment. *Origini* **34**, 125-151 (2014).
11. Kohl P, Trifonov V. The Prehistory of the Caucasus: Internal Developments and External Interactions. In: *The Cambridge World Prehistory* (ed<sup>^</sup>(eds Renfrew C, Bahn P). Cambridge University Press (2014).
12. Kohl P. *The Making of Bronze Age Eurasia* Cambridge University Press (2007).
13. Librado P, *et al.* The Evolutionary Origin and Genetic Makeup of Domestic Horses. *Genetics* **204**, 423-434 (2016).

- 868 14. Benecke N, Becker C, Küchelmann HC. Finding the Woolly Sheep. Meta-  
869 analyses of archaeozoological data from Southwest-Asia and Southeast-  
870 Europe. *e-Forschungsberichte* **1**, 12-18 (2017).  
871
- 872 15. Reinhold S, *et al.* Contextualising Innovation: Cattle Owners and Wagon  
873 Drivers in the North Caucasus and Beyond. In: *Appropriating innovations:  
874 entangled knowledge in Eurasia 5000-1500 BCE, Papers of the Conference*  
875 (ed<sup>^</sup>(eds Maran J, Stockhammer PW). Oxbow Books (2017).  
876
- 877 16. Anthony DW, Brown DR. The Secondary Products Revolution, Horse-Riding,  
878 and Mounted Warfare. *J World Prehist* **24**, 131-160 (2011).  
879
- 880 17. Anthony DW. *The Horse, the Wheel, and Language: How Bronze-Age Riders*  
881 *from the Eurasian Steppes Shaped the Modern World*. Princeton University  
882 Press (2007).  
883
- 884 18. Frachetti MD. Multiregional Emergence of Mobile Pastoralism and  
885 Nonuniform Institutional Complexity across Eurasia. *Current Anthropology*  
886 **53**, 2–38 (2012).  
887
- 888 19. Haak W, *et al.* Massive migration from the steppe was a source for Indo-  
889 European languages in Europe. *Nature* **522**, 207-211 (2015).  
890
- 891 20. Allentoft ME, *et al.* Population genomics of Bronze Age Eurasia. *Nature* **522**,  
892 167-172 (2015).  
893
- 894 21. Narasimhan VM, *et al.* The Genomic Formation of South and Central Asia.  
895 *bioRxiv*, (2018).  
896
- 897 22. Govedarica B. *Zepterträger, Herrscher der Steppen: Die frühen Ockergräber*  
898 *des älteren Äneolithikums im karpatenbalkanischen Gebiet und im*  
899 *Steppenraum Südost- und Osteuropas*. von Zabern (2004).  
900
- 901 23. Lazaridis I, *et al.* Genomic insights into the origin of farming in the ancient  
902 Near East. *Nature* **536**, 419-424 (2016).  
903
- 904 24. Mathieson I, *et al.* The genomic history of southeastern Europe. *Nature*,  
905 (2018).  
906
- 907 25. Günther T, Jakobsson M. Genes mirror migrations and cultures in prehistoric  
908 Europe-a population genomic perspective. *Curr Opin Genet Dev* **41**, 115-123  
909 (2016).  
910
- 911 26. Lazaridis I, *et al.* Ancient human genomes suggest three ancestral populations  
912 for present-day Europeans. *Nature* **513**, 409-413 (2014).  
913
- 914 27. Mathieson I, *et al.* Genome-wide patterns of selection in 230 ancient  
915 Eurasians. *Nature* **528**, 499-503 (2015).  
916

- 917 28. Jones ER, *et al.* Upper Palaeolithic genomes reveal deep roots of modern  
918 Eurasians. *Nat Commun* **6**, 8912 (2015).  
919
- 920 29. Broushaki F, *et al.* Early Neolithic genomes from the eastern Fertile Crescent.  
921 *Science* **353**, 499-503 (2016).  
922
- 923 30. Schonberg A, Theunert C, Li M, Stoneking M, Nasidze I. High-throughput  
924 sequencing of complete human mtDNA genomes from the Caucasus and West  
925 Asia: high diversity and demographic inferences. *Eur J Hum Genet* **19**, 988-  
926 994 (2011).  
927
- 928 31. Stein G. The Development of Indigenous Social Complexity in Late  
929 Chalcolithic Upper Mesopotamia in the 5th–4th Millennia BC: An Initial  
930 Assessment. *Origini*, 125–151 (2012).  
931
- 932 32. Fu Q, *et al.* An early modern human from Romania with a recent Neanderthal  
933 ancestor. *Nature* **524**, 216-219 (2015).  
934
- 935 33. Mallick S, *et al.* The Simons Genome Diversity Project: 300 genomes from  
936 142 diverse populations. *Nature* **538**, 201-206 (2016).  
937
- 938 34. Lipson M, *et al.* Parallel palaeogenomic transects reveal complex genetic  
939 history of early European farmers. *Nature* **551**, 368-372 (2017).  
940
- 941 35. Olalde I, *et al.* The Beaker phenomenon and the genomic transformation of  
942 northwest Europe. *Nature*, (2018).  
943
- 944 36. Raghavan M, *et al.* Upper Palaeolithic Siberian genome reveals dual ancestry  
945 of Native Americans. *Nature* **505**, 87-91 (2014).  
946
- 947 37. Fu Q, *et al.* The genetic history of Ice Age Europe. *Nature* **534**, 200-205  
948 (2016).  
949
- 950 38. Kilinc GM, *et al.* The Demographic Development of the First Farmers in  
951 Anatolia. *Curr Biol* **26**, 2659-2666 (2016).  
952
- 953 39. Omrak A, *et al.* Genomic Evidence Establishes Anatolia as the Source of the  
954 European Neolithic Gene Pool. *Curr Biol* **26**, 270-275 (2016).  
955
- 956 40. Gallego-Llorente M, *et al.* The genetics of an early Neolithic pastoralist from  
957 the Zagros, Iran. *Sci Rep* **6**, 31326 (2016).  
958
- 959 41. Hofmanova Z, *et al.* Early farmers from across Europe directly descended  
960 from Neolithic Aegeans. *Proc Natl Acad Sci U S A* **113**, 6886-6891 (2016).  
961
- 962 42. Olalde I, *et al.* Derived immune and ancestral pigmentation alleles in a 7,000-  
963 year-old Mesolithic European. *Nature* **507**, 225-228 (2014).  
964
- 965 43. Gamba C, *et al.* Genome flux and stasis in a five millennium transect of  
966 European prehistory. *Nat Commun* **5**, 5257 (2014).

- 967  
968 44. Patterson N, *et al.* Ancient admixture in human history. *Genetics* **192**, 1065-  
969 1093 (2012).  
970  
971 45. Alexander DH, Novembre J, Lange K. Fast model-based estimation of  
972 ancestry in unrelated individuals. *Genome Res* **19**, 1655-1664 (2009).  
973  
974 46. Loh P-R, *et al.* Inferring admixture histories of human populations using  
975 linkage disequilibrium. *Genetics* **193**, 1233-1254 (2013).  
976  
977 47. Moorjani P, Sankararaman S, Fu Q, Przeworski M, Patterson N, Reich D. A  
978 genetic method for dating ancient genomes provides a direct estimate of  
979 human generation interval in the last 45,000 years. *Proc Natl Acad Sci U S A*  
980 **113**, 5652-5657 (2016).  
981  
982 48. Forsyth J. *The Caucasus. A history*. Cambridge University Press (2013).  
983  
984 49. Trifonov V. Sushchestvoval li na Severo-Zapadnom Kavkaze neolit? In:  
985 *Adaptaciya kultur paleolita - eneolita k izmeniyam prirodnoy sredy na Severo-*  
986 *Zapadnom Kavkaze* (ed<sup>^</sup>(eds Trifonov VA). Institut Istorii Materielnoy  
987 Kultury RAN (2009).  
988  
989 50. Gorelik A. Zu kaukasischen und vorderasiatischen Einflüssen bei der  
990 Neolithisierung im unteren Donbecken. *Eurasia Antiqua* **20**, 143-170 (2014  
991 [2017]).  
992  
993 51. Pitshelauri K. Uruk migrants in the Caucasus. *Bull Georg Natl Acad Sci* **6**,  
994 (2012).  
995  
996 52. Sherratt A. *Economy and society in prehistoric Europe: Changing*  
997 *perspectives*. Princeton University Press (1997).  
998  
999 53. Hansen S. The 4th millennium: a watershed in European Prehistory. In:  
1000 *Western Anatolia before Troy. Proto-Urbanisation in the 4th Millenium BC?*  
1001 (ed<sup>^</sup>(eds Horjes B, Mehofer M). Verlag der Österreichischen Akademie der  
1002 Wissenschaften (2014).  
1003  
1004 54. Reinhold S, *et al.* Contextualising innovation. About cattle owners and wagon  
1005 drivers in the North Caucasus and beyond. In: *Appropriating Innovation.*  
1006 *Entangled knowledge in Eurasia, 5000-1500 BCE* (ed<sup>^</sup>(eds Maran J,  
1007 Stockhammer P). Oxbow Books (2017).  
1008  
1009 55. Shishlina N. *Reconstruction of the Bronze Age of the Caspian steppes: Life*  
1010 *styles and life ways of pastoral nomads*. Archaeopress [u.a.] (2008).  
1011  
1012 56. Hansen S. Communication and exchange between the Northern Caucasus and  
1013 Central Europe in the fourth millenium BC. In: *Von Majkop bis Trialeti.*  
1014 *Gewinnung und Verbreitung von Metallen und Obsidian in Kaukasien im 4.-2.*  
1015 *Jt. v. Chr.* (ed<sup>^</sup>(eds Hansen S, Hauptmann A, Motzenbäcker I, Pernicka E).  
1016 Habelt (2010).

- 1017  
1018 57. Szmyt M. Fourth-third millennium BC stone cist graves between the  
1019 Carpathians and Crimea. An outline of issues. *Baltic-Pontic Studies* **19**, 107-  
1020 147 (2014).  
1021  
1022 58. Belinskij A, Hansen S, Reinhold S. The Great Kurgan from Nalçik - A  
1023 Preliminary Report. In: *At the Northern Frontier of Near Eastern*  
1024 *Archaeology: Recent Research on Caucasia and Anatolia in the Bronze Age*  
1025 (ed<sup>^</sup>(eds Rova E, Tonussi M). Turnhout (2017).  
1026  
1027 59. Rassamakin JJ. *Die nordpontische Steppe in der Kupferzeit: Gräber aus der*  
1028 *Mitte des 5. Jts. bis Ende des 4. Jt. v. Chr.* von Zabern (2004).  
1029  
1030 60. Trifonov VA. Zapadne predeli rasprostraneniya maykopskoy kultury. *Izvestiya*  
1031 *Samarskogo Nauchnogo Centra Rossiyskoy Akademii Nauk* **16**, 276–284  
1032 (2014).  
1033  
1034 61. Szmyt M. A view from the Northwest: Interaction network in the Dnieper-  
1035 Carpatian area and the people of the Globular Ampora Culture in the Third  
1036 millennium BC. In: *Transitions to the bronze age* (ed<sup>^</sup>(eds Heyd V).  
1037 Archaeolingua Alapítvány (2013).  
1038  
1039 62. Furholt M. Upending a ‘Totality’: Re-evaluating Corded Ware Variability in  
1040 Late Neolithic Europe. *P Prehist Soc* **80**, 67–86 (2014).  
1041  
1042 63. Furholt M. Massive Migrations? The Impact of Recent aDNA Studies on our  
1043 View of Third Millennium Europe. *European Journal of Archaeology*, 1-33  
1044 (2017).  
1045  
1046 64. Mallory JP. *In Search of the Indo-Europeans: Language, Archaeology and*  
1047 *Myth*. Thames and Hudson (1991).  
1048  
1049 65. Dabney J, *et al.* Complete mitochondrial genome sequence of a Middle  
1050 Pleistocene cave bear reconstructed from ultrashort DNA fragments. *Proc*  
1051 *Natl Acad Sci U S A* **110**, 15758-15763 (2013).  
1052  
1053 66. Rohland N, Harney E, Mallick S, Nordenfelt S, Reich D. Partial uracil-DNA-  
1054 glycosylase treatment for screening of ancient DNA. *Philos Trans R Soc Lond*  
1055 *B Biol Sci* **370**, 20130624 (2015).  
1056  
1057 67. Renaud G, Stenzel U, Kelso J. leeHom: adaptor trimming and merging for  
1058 Illumina sequencing reads. *Nucleic Acids Res* **42**, e141 (2014).  
1059  
1060 68. Peltzer A, *et al.* EAGER: efficient ancient genome reconstruction. *Genome*  
1061 *Biol* **17**, 60 (2016).  
1062  
1063 69. Li H, Durbin R. Fast and accurate short read alignment with Burrows-Wheeler  
1064 transform. *Bioinformatics* **25**, (2009).  
1065



- 1066 70. Korneliussen TS, Albrechtsen A, Nielsen R. ANGSD: Analysis of Next  
1067 Generation Sequencing Data. *BMC Bioinformatics* **15**, 1-13 (2014).  
1068
- 1069 71. Jeong C, *et al.* Characterizing the genetic history of admixture across inner  
1070 Eurasia. *bioRxiv*, (2018).  
1071
- 1072 72. Purcell S, *et al.* PLINK: a tool set for whole-genome association and  
1073 population-based linkage analyses. *Am J Hum Genet* **81**, 559-575 (2007).  
1074
- 1075 73. Li H, *et al.* The Sequence Alignment/Map format and SAMtools.  
1076 *Bioinformatics* **25**, 2078-2079 (2009).  
1077
- 1078 74. Kearse M, *et al.* Geneious Basic: an integrated and extendable desktop  
1079 software platform for the organization and analysis of sequence data.  
1080 *Bioinformatics* **28**, 1647-1649 (2012).  
1081
- 1082 75. Weissensteiner H, *et al.* HaploGrep 2: mitochondrial haplogroup classification  
1083 in the era of high-throughput sequencing. *Nucleic Acids Res* **44**, W58-63  
1084 (2016).  
1085
- 1086 76. Fu Q, *et al.* A revised timescale for human evolution based on ancient  
1087 mitochondrial genomes. *Curr Biol* **23**, 553-559 (2013).  
1088
- 1089 77. Lipatov M, Sanjeev K, Patro R, Veeramah K. Maximum Likelihood  
1090 Estimation of Biological Relatedness from Low Coverage Sequencing Data.  
1091 *bioRxiv*, (2015).  
1092
- 1093 78. Monroy Kuhn JM, Jakobsson M, Günther T. Estimating genetic kin  
1094 relationships in prehistoric populations. *bioRxiv*, (2017).  
1095  
1096  
1097  
1098

1099 **Figures and Figure legends**

1100

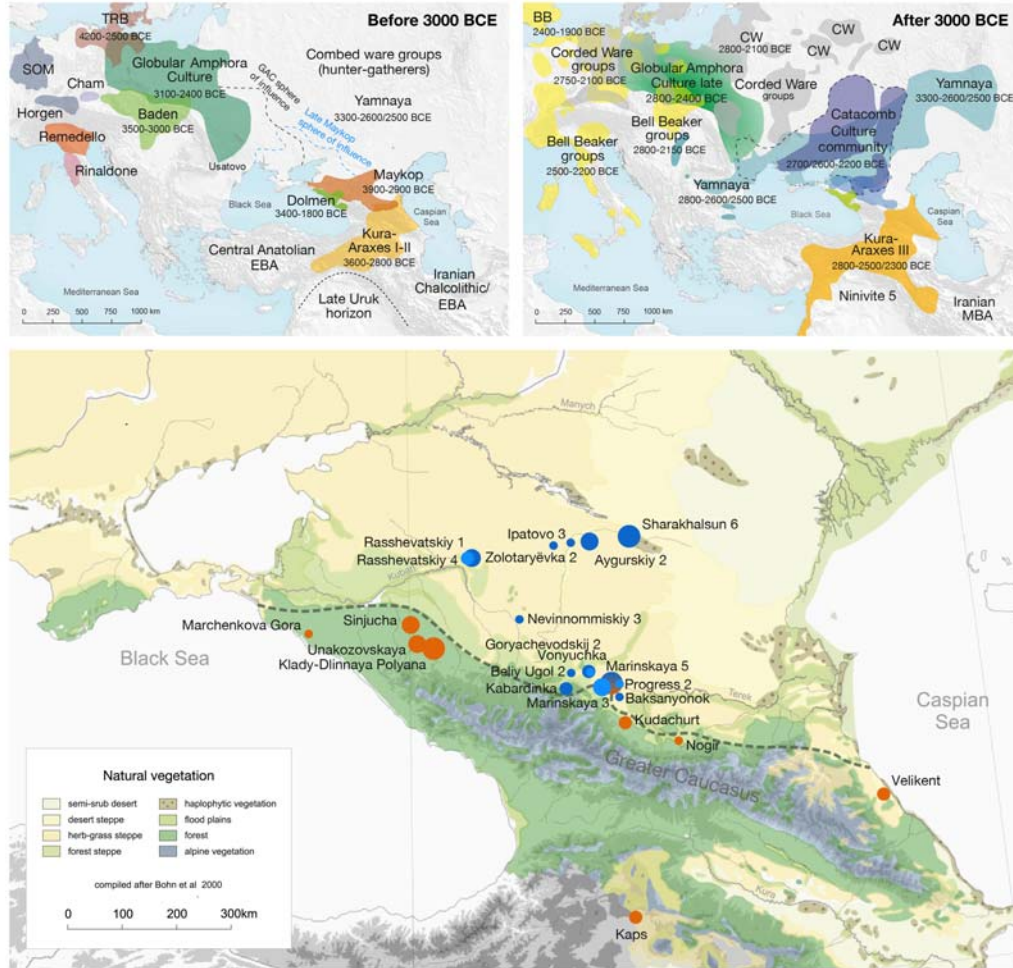

1101

1102

**Fig. 1. Map of sites and archaeological cultures mentioned in this study.**

1103

1104 Temporal and geographic distribution of archaeological cultures are shown for two  
1105 windows in time that are critical for our data. The zoomed map shows the location of  
1106 sites in the Caucasus. The size of the circle reflects number of individuals that  
1107 produced genome-wide data. The dashed line illustrates a hypothetical geographic  
1108 border between genetically distinct *Steppe* and *Caucasus* clusters. (BB=*Bell Beaker*;  
1109 CW=*Corded Ware*; TRB=*Trichterbecher/Funnel Beaker*; SOM=*Seine-Oise-Marne*  
1110 complex)

1110

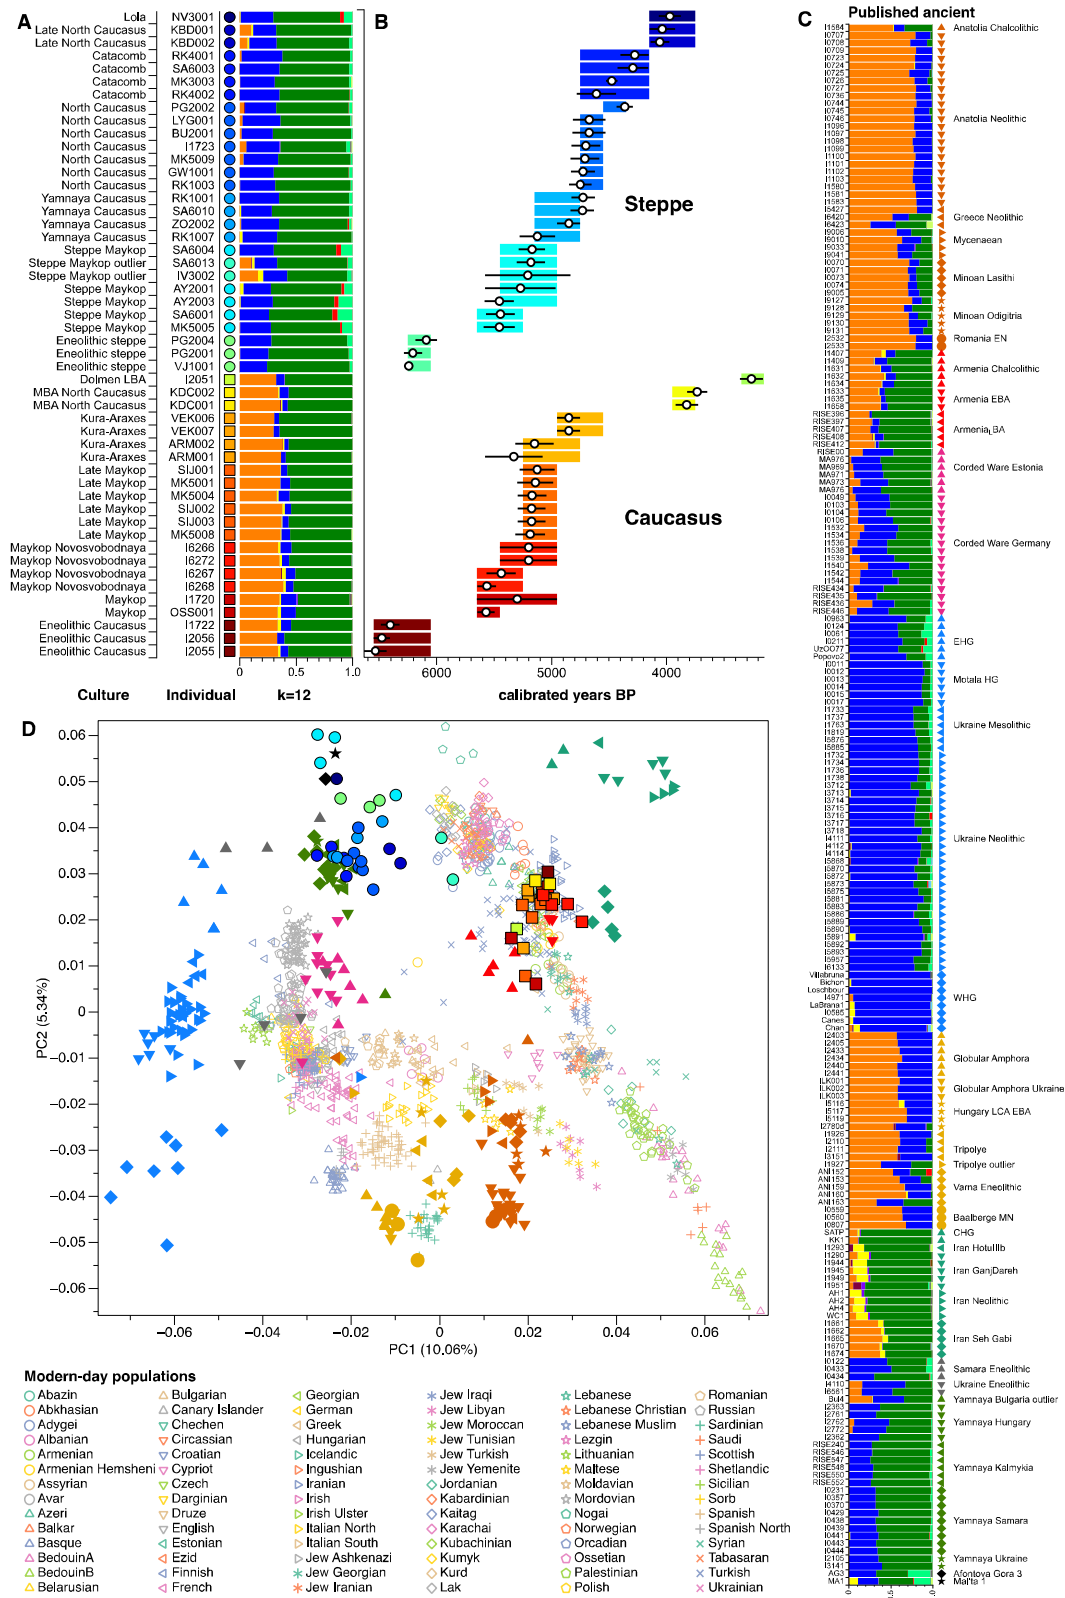

1111  
1112

1113 **Fig. 2. ADMIXTURE and PCA results, and chronological order of ancient**  
1114 **Caucasus individuals.** (a) *ADMIXTURE* results ( $k=12$ ) of the newly genotyped  
1115 individuals (filled symbols with black outlines) sorted by genetic clusters (*Steppe* and  
1116 *Caucasus*) and in chronological order (coloured bars indicate the relative  
1117 archaeological dates, (b) white circles the mean calibrated radiocarbon date and the  
1118 errors bars the 2-sigma range. (c) *ADMIXTURE* results of relevant prehistoric  
1119 individuals mentioned in the text (filled symbols) and (d) shows these projected onto  
1120 a PCA of 84 modern-day West Eurasian populations (open symbols).  
1121

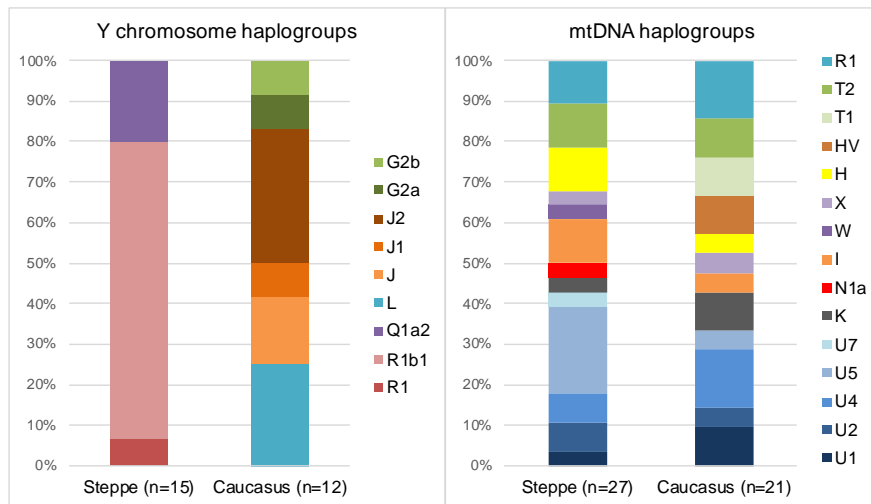

1122  
1123  
1124  
1125

**Fig. 3. Comparison of Y-chromosome (A) and mitochondrial (B) haplogroup distribution in the *Steppe* and *Caucasus* cluster.**



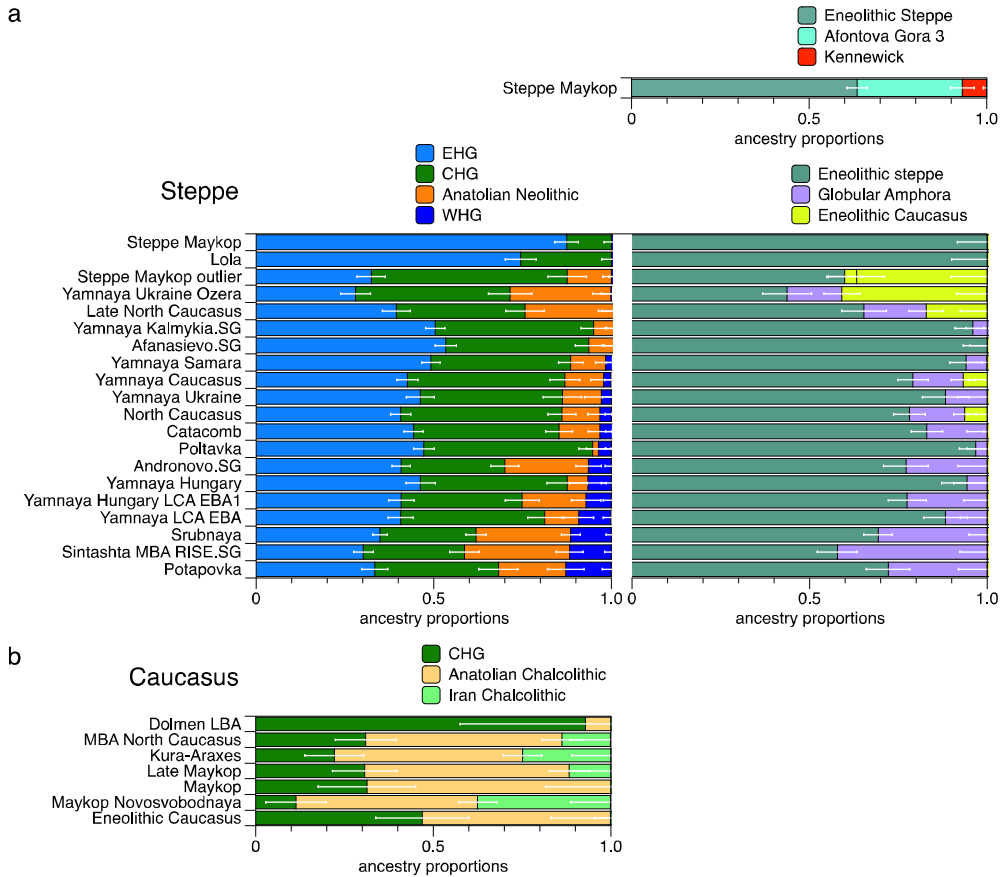

1126  
1127  
1128  
1129  
1130  
1131  
1132  
1133

**Fig. 4. Modelling results for the Steppe and Caucasus cluster.** Admixture proportions based on (temporally and geographically) distal and proximal models, showing additional Anatolian farmer-related ancestry in Steppe groups as well as additional gene flow from the south in some of the Steppe groups as well as the Caucasus groups (see also Supplementary Tables 10, 14 and 20).

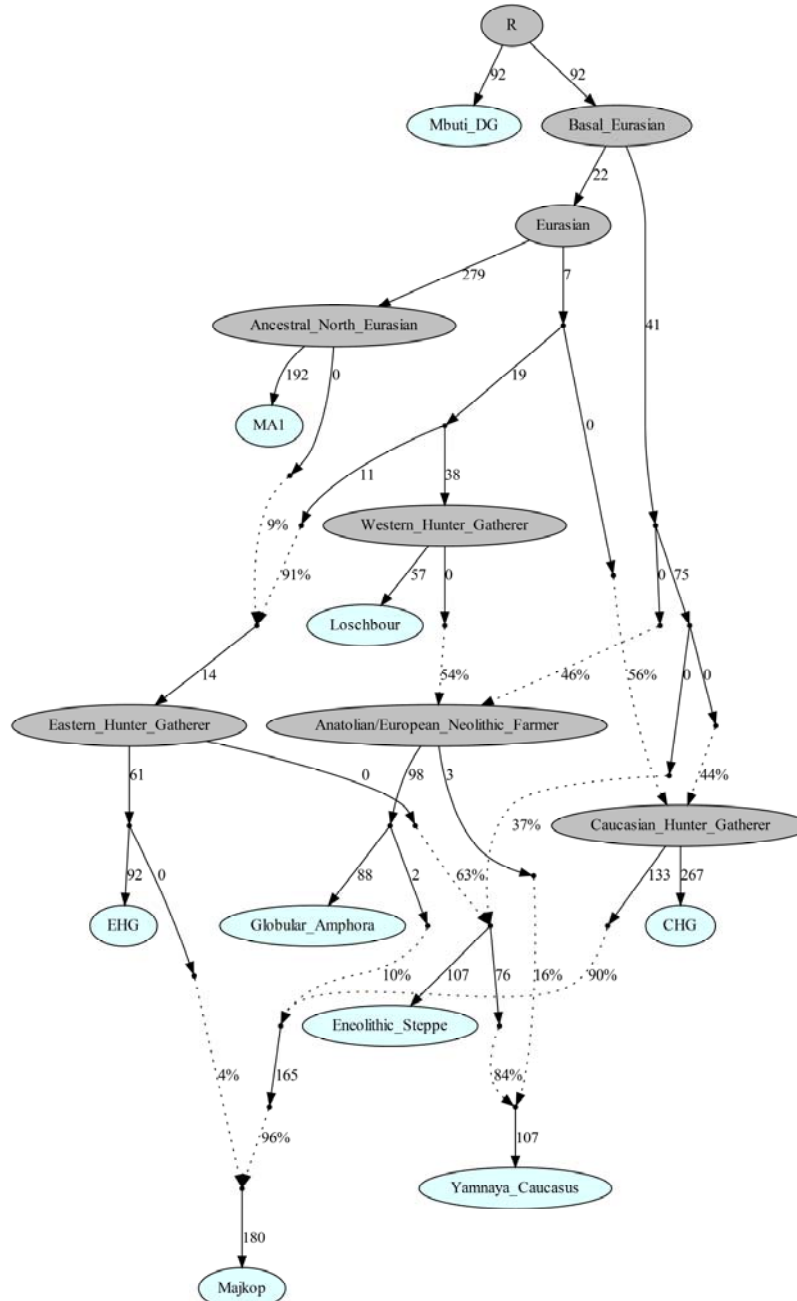

1134

1135

1136

1137

1138

1139

1140

1141

1142

1143

**Fig. 5. Admixture Graph modelling of the population history of the Caucasus region.** We started with a skeleton tree without admixture including Mbuti, Loschbour and MA1. We grafted onto this EHG, CHG, Globular\_Amphora, Eneolithic\_steppe, Maykop, and Yamnaya\_Caucasus, adding them consecutively to all possible edges in the tree and retaining only graph solutions that provided no differences of  $|Z| > 3$  between fitted and estimated statistics. The worst match is  $|Z| = 2.824$  for this graph. We note that the maximum discrepancy is  $f_4(\text{MA1}, \text{Maykop}; \text{EHG}, \text{Eneolithic\_steppe}) = -3.369$  if we do not add the 4% EHG ancestry to Maykop. Drifts along edges are multiplied by 1000 and dashed lines represent admixture.
